# Supplementary material for: J-Shaped Association of Tomato Intake with New-Onset Hypertension in General Adults: A Nationwide Prospective Cohort Study
Source: MDPI journal article supplement (doi:10.3390/nu14224813), 2022-11-14
Supplement: s1 [file s1]

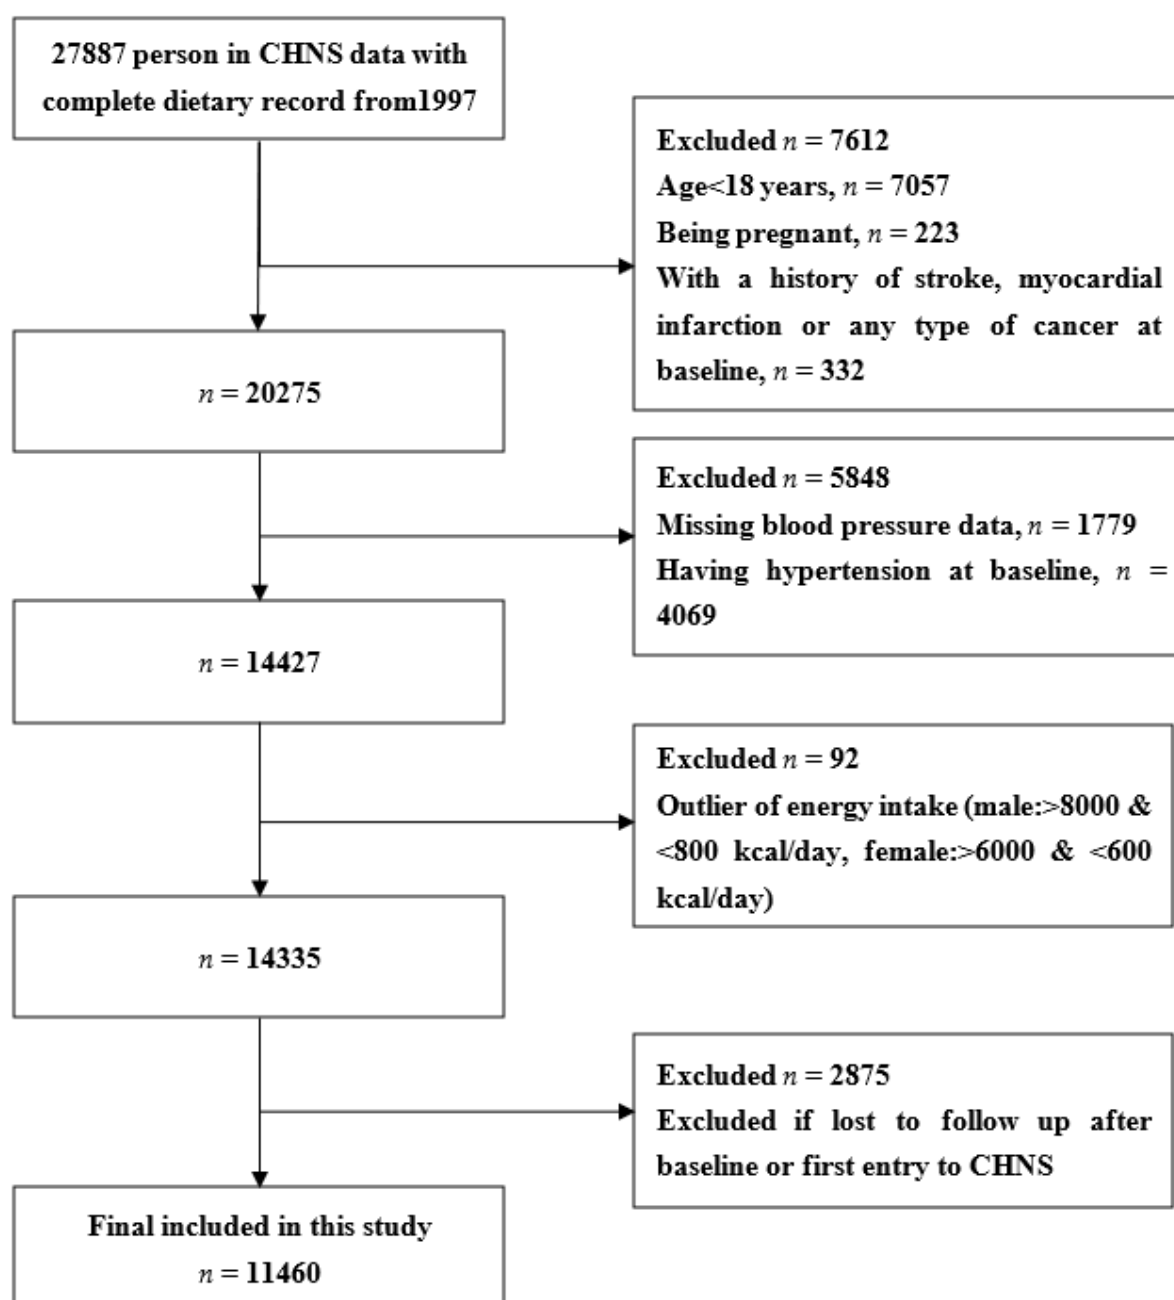

**Supplementary Figure S1.** Flow chart of study participants.

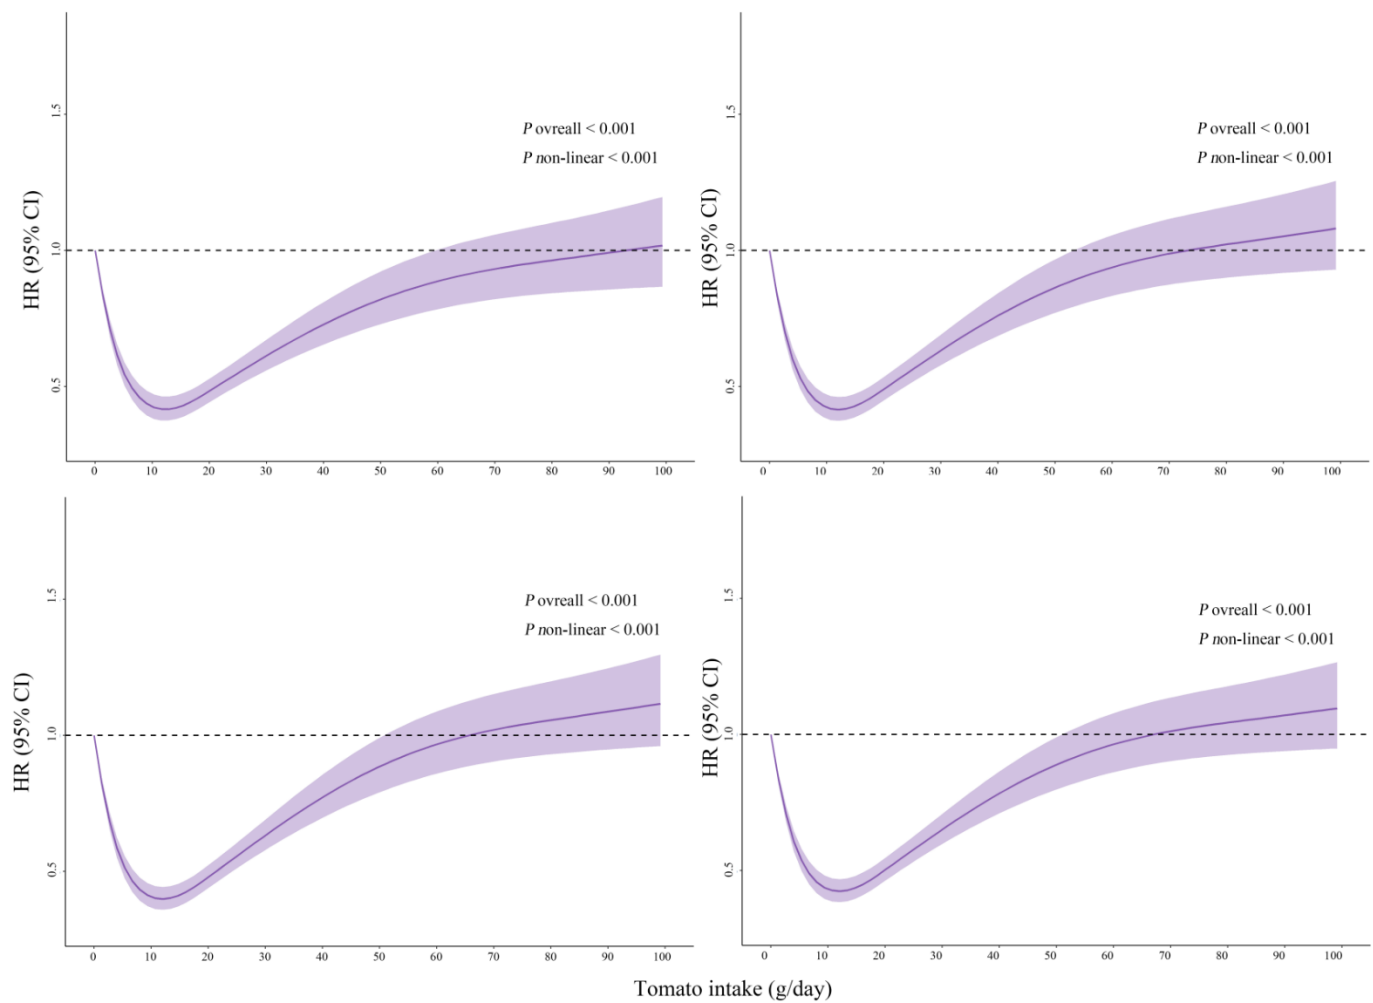

**Supplementary Figure S2.** Dose-response relationship between the intake of dietary tomato and new-onset hypertension in various sensitivity analyses. A. After excluding new-onset hypertension occurring during the first 2 years of follow-up; B. Dose-response relationship between raw tomato intake with risk of new-onset hypertension; C. The follow-up person-time was calculated as from baseline until the first hypertension diagnosis; D. Use a multiple imputation procedure with 5 rounds of imputation.

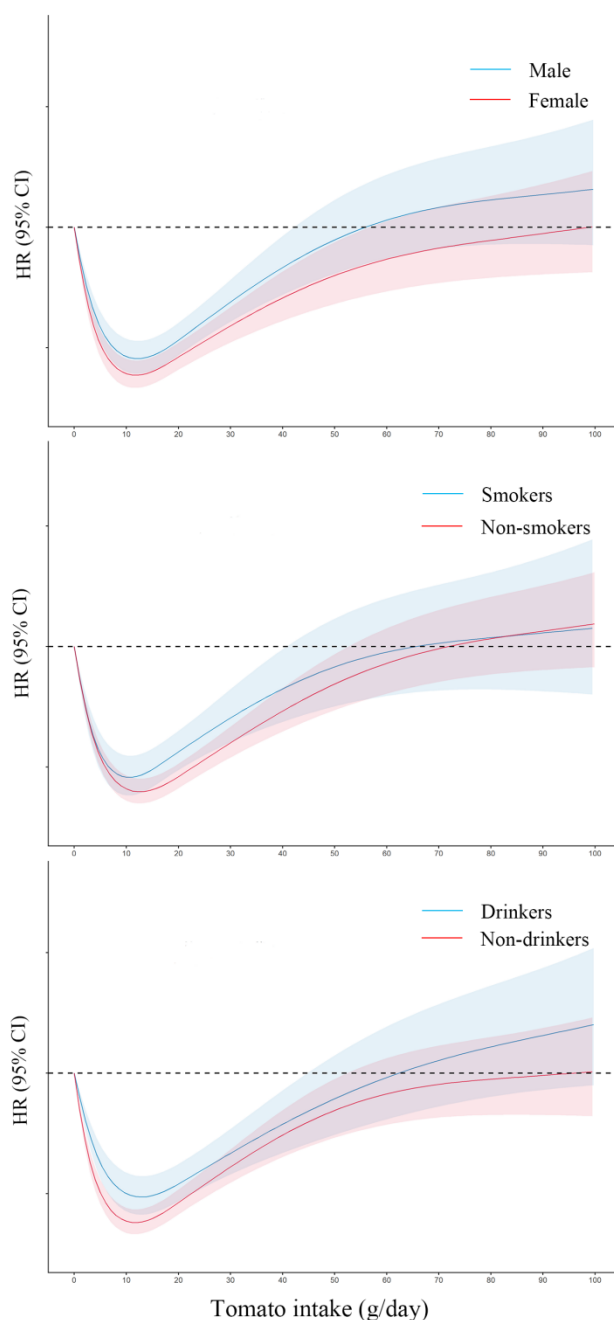

**Supplementary Figure S3.** Dose-response relationship between intake of total tomato and new-onset hypertension stratified by sex (A), smoking (B) and drinking (C) status. Restricted cubic spline Cox proportional hazard regression model with 4 knots were adjusted for age at baseline (continuous), sex (male/female), BMI (continuous), smoking (yes/no) and drinking status (yes/no), education (middle school or below, high school or college or above), residence (urban or rural), marital status, physical activity (continuous), as well as cumulative average vegetables (continuous), fruits (continuous), and energy intake (continuous), not including the stratification variable for each subgroup. Abbreviations: BMI, body mass index; CI, Confidence Interval; HR, Hazard Ratio.

**Supplementary Table S1.** The numbers (percentages) of participants with missing covariates.

| Covariates        | <i>n</i> (%) |
|-------------------|--------------|
| Physical activity | 333 (2.91)   |
| Education level   | 227 (1.98)   |
| Alcohol consumer  | 131 (1.14)   |

|                           |           |
|---------------------------|-----------|
| Married status            | 98 (0.85) |
| BMI                       | 64 (0.56) |
| Former or current smoker  | 51 (0.45) |
| Energy                    | 4 (0.05)  |
| Total carbohydrate intake | 4 (0.05)  |
| Total fat intake          | 4 (0.05)  |
| Total protein intake      | 4 (0.05)  |

Supplementary Table S2. Characteristics of participants according to sex \*.

| Characteristics                                 | Total<br>(n = 11460) | Male<br>(n = 5234) | Female<br>(n = 6226) | P      |
|-------------------------------------------------|----------------------|--------------------|----------------------|--------|
| Age, years                                      | 41.7 (13.9)          | 41.8 (14.1)        | 41.6 (13.8)          | 0.654  |
| BMI, kg/m <sup>2</sup>                          | 22.5 (3.2)           | 22.4 (3.1)         | 22.5 (3.3)           | 0.042  |
| SBP, mmHg                                       | 114.1 (11.5)         | 116.1 (10.6)       | 112.3 (11.9)         | <0.001 |
| DBP, mmHg                                       | 74.2 (7.8)           | 75.5 (7.4)         | 73.2 (8.0)           | <0.001 |
| Married, (n %)                                  | 9571 (88.8)          | 4221 (84.1)        | 5350 (92.9)          | <0.001 |
| Education level, (n %)                          |                      |                    |                      | <0.001 |
| Middle school or below                          | 7933 (70.6)          | 3456 (67.1)        | 4477 (73.6)          |        |
| High school                                     | 2458 (21.9)          | 1262 (24.5)        | 1196 (19.7)          |        |
| College or above                                | 842 (7.5)            | 433 (8.4)          | 409 (6.7)            |        |
| Former or current smoker, (n %)                 | 3502 (30.6)          | 3289 (62.8)        | 213 (3.4)            | <0.001 |
| Alcohol consumer, (n %)                         | 3932 (34.7)          | 3260 (62.7)        | 672 (11.0)           | <0.001 |
| Urban residence, (n %)                          | 7050 (61.5)          | 3247 (62.0)        | 3803 (61.1)          | 0.305  |
| Physical activity, METs-h/week,<br>median [IQR] | 88.9 [18.0;206.5]    | 104.5 [26.9;234.8] | 79.3 [15.5;185.7]    | <0.001 |
| Energy, kcal/day                                | 2143.8 (564.3)       | 2343.0 (573.5)     | 1976.4 (498.4)       | <0.001 |
| Total fat, % of energy                          | 29.8 (10.5)          | 29.1 (10.4)        | 30.3 (10.5)          | <0.001 |
| Total carbohydrate, % of energy                 | 56.8 (11.3)          | 56.9 (11.5)        | 56.7 (11.1)          | 0.465  |
| Total protein, % of energy                      | 12.7 (2.7)           | 12.6 (2.7)         | 12.8 (2.8)           | <0.001 |
| Vegetable intake, g/day                         | 301.1 (136.3)        | 313.8 (141.9)      | 290.3 (130.4)        | <0.001 |
| Fruit intake, g/day                             | 0.0 [0.0;50.0]       | 0.0 [0.0;33.3]     | 0.0 [0.0;66.7]       | <0.001 |
| Tomato intake, g/day, median<br>[IQR]           | 0.0 [0.0;13.9]       | 0.0 [0.0;13.3]     | 0.0 [0.0;13.9]       | 0.228  |

\* Continuous variables are presented as mean (SD), median (IQR) or categorical variables are presented as n (%). Abbreviations: BMI, Body Mass Index; SBP, Systolic Blood Pressure; DBP, Diastole Blood Pressure; CI, Confidence Interval.

Supplementary Table S3. Association between dietary tomato intake and new-onset hypertension in various sensitivity analyses.

| Various sensitivity analyses                                                                     | Dietary tomato intake (g/day) <sup>a</sup> |                  |                  |                  | p trend |
|--------------------------------------------------------------------------------------------------|--------------------------------------------|------------------|------------------|------------------|---------|
|                                                                                                  | Group 1                                    | Group 2          | Group 3          | Group 4          |         |
| Exclude of new-onset hypertension occurring during the first 2 years of follow-up                | 1.0                                        | 0.42 (0.37,0.47) | 0.51 (0.45,0.57) | 0.77 (0.69,0.87) | < 0.001 |
| The relationship between raw tomato intake with risk of new-onset hypertension                   | 1.0                                        | 0.41 (0.37,0.46) | 0.51 (0.45,0.57) | 0.82 (0.73,0.92) | < 0.001 |
| The follow-up person-time was calculated as from baseline until the first hypertension diagnosis | 1.0                                        | 0.40 (0.36,0.45) | 0.50 (0.44,0.55) | 0.84 (0.75,0.94) | < 0.001 |
| Use a multiple imputation procedure with 5 rounds of imputation                                  | 1.0                                        | 0.42 (0.37,0.46) | 0.53 (0.48,0.59) | 0.84 (0.76,0.93) | < 0.001 |

<sup>a</sup> Multivariate hazard ratios (95% CIs) adjusted for age at baseline (continuous), sex (male/female), BMI (continuous), smoking (yes/no) and drinking status (yes/no), education (middle school or below, high school or college or above), residence (urban or rural), marital status, physical activity (continuous), as well as vegetables (continuous), fruits (continuous), and energy intake (continuous).

**Supplementary Table S4.** The relationship of dietary tomato intake of five categories with risk of new-onset hypertension.

| Total tomato, g/day | No. of cases/ person-years | Crude model      |          |                | Adjusted model <sup>a</sup> |          |                |
|---------------------|----------------------------|------------------|----------|----------------|-----------------------------|----------|----------------|
|                     |                            | HR (95% CI)      | <i>p</i> | <i>p</i> trend | HR (95% CI)                 | <i>p</i> | <i>p</i> trend |
| Five categories     |                            |                  |          |                |                             |          |                |
| Group 1             | 2797/51308                 | Ref              |          |                | Ref                         |          |                |
| Group 2             | 296/13485                  | 0.37 (0.33,0.42) | <0.001   |                | 0.40 (0.35,0.46)            | <0.001   |                |
| Group 3             | 325/11455                  | 0.51 (0.45,0.57) | <0.001   |                | 0.50 (0.44,0.57)            | <0.001   |                |
| Group 4             | 318/8856                   | 0.59 (0.52,0.67) | <0.001   |                | 0.6 (0.53,0.68)             | <0.001   |                |
| Group 5             | 318/7231                   | 0.81 (0.72,0.91) | <0.001   | <0.001         | 0.81 (0.71,0.92)            | 0.001    | <0.001         |

<sup>a</sup>Adjusted for age at baseline (continuous), sex (male/female), BMI (continuous), smoking (yes/no) and drinking status (yes/no), education (middle school or below, high school or college or above), residence (urban or rural), marital status, physical activity (continuous), as well as vegetables (continuous), fruits (continuous), and energy intake (continuous). Abbreviations: HR, Hazard Ratio; CI, Confidence Interval

**Supplementary Table S5.** The E-values of tomato intake with risk of new-onset hypertension, E-value (CI).

| Exposure     | Consumers (g/day) |             |              |            |
|--------------|-------------------|-------------|--------------|------------|
|              | Group 1           | Group 2     | Group 3      | Group 4    |
| Total tomato | 1 (ref)           | 2.35 (1.91) | 3.031 (2.85) | 1.61(1.36) |

Abbreviations: CI, Confidence Interval.

**Supplementary Table S6.** Stratified analyses of the associations between tomato intake and new-onset hypertension.

| Sungroup                  | Group   | No. of cases/person-years | Tomato intake, g/day <sup>a</sup> |                |                | <i>p</i> for interaction |
|---------------------------|---------|---------------------------|-----------------------------------|----------------|----------------|--------------------------|
|                           |         |                           | HR (95% CI)                       | <i>p</i> value | <i>p</i> trend |                          |
| Male                      | Group 1 | 1387/23770                | ref                               |                | <0.001         | 0.024                    |
|                           | Group 2 | 182/7202                  | 0.46 (0.39,0.54)                  | <0.001         |                |                          |
|                           | Group 3 | 210/6364                  | 0.55 (0.47,0.64)                  | <0.001         |                |                          |
|                           | Group 4 | 229/4480                  | 0.90 (0.77,1.05)                  | 0.163          |                |                          |
| Female                    | Group 1 | 1410/27539                | ref                               |                | <0.001         |                          |
|                           | Group 2 | 199/9778                  | 0.39 (0.33,0.45)                  | <0.001         |                |                          |
|                           | Group 3 | 197/8020                  | 0.48 (0.41,0.57)                  | <0.001         |                |                          |
|                           | Group 4 | 201/5182                  | 0.76 (0.65,0.89)                  | <0.001         |                |                          |
| Age < 45 years            | Group 1 | 1254/ 34306               | ref                               |                | <0.001         | 0.119                    |
|                           | Group 2 | 208/11854                 | 0.47 (0.4,0.54)                   | < 0.001        |                |                          |
|                           | Group 3 | 208/10264                 | 0.51 (0.44,0.6)                   | < 0.001        |                |                          |
|                           | Group 4 | 188/6300                  | 0.84 (0.7,0.99)                   | 0.040          |                |                          |
| Age ≥ 45 years            | Group 1 | 1543/17002                | ref                               |                | <0.001         |                          |
|                           | Group 2 | 173/5126                  | 0.36 (0.3,0.42)                   | <0.001         |                |                          |
|                           | Group 3 | 199/4121                  | 0.51 (0.44,0.6)                   | <0.001         |                |                          |
|                           | Group 4 | 242/3363                  | 0.83 (0.71,0.96)                  | 0.010          |                |                          |
| BMI < 24kg/m <sup>2</sup> | Group 1 | 1832/40008                | ref                               |                | <0.001         | 0.970                    |
|                           | Group 2 | 250/13626                 | 0.40 (0.35,0.46)                  | <0.001         |                |                          |
|                           | Group 3 | 254/10650                 | 0.55 (0.48,0.63)                  | <0.001         |                |                          |

|                                                   |         |            |                  |        |        |       |
|---------------------------------------------------|---------|------------|------------------|--------|--------|-------|
| BMI $\geq 24\text{kg/m}^2$                        | Group 4 | 243/6890   | 0.87 (0.75,1.00) | 0.057  | <0.001 | 0.500 |
|                                                   | Group 1 | 949/10994  | ref              |        |        |       |
|                                                   | Group 2 | 131/3241   | 0.45 (0.37,0.55) | <0.001 |        |       |
|                                                   | Group 3 | 149/3632   | 0.47 (0.39,0.56) | <0.001 |        |       |
| SBP <120 mmHg                                     | Group 4 | 185/2720   | 0.80 (0.67,0.95) | 0.013  | <0.001 | 0.500 |
|                                                   | Group 1 | 1382/34889 | ref              |        |        |       |
|                                                   | Group 2 | 225/12312  | 0.43 (0.37,0.50) | <0.001 |        |       |
|                                                   | Group 3 | 231/9865   | 0.56 (0.48,0.65) | <0.001 |        |       |
| SBP $\geq 120$ mmHg                               | Group 4 | 174/5940   | 0.77 (0.65,0.91) | 0.002  | <0.001 | 0.043 |
|                                                   | Group 1 | 1415/16420 | ref              |        |        |       |
|                                                   | Group 2 | 156/4667   | 0.41 (0.35,0.49) | <0.001 |        |       |
|                                                   | Group 3 | 176/4520   | 0.46 (0.39,0.54) | <0.001 |        |       |
| Smoking: no                                       | Group 4 | 256/3723   | 0.83 (0.72,0.97) | 0.016  | <0.001 | 0.044 |
|                                                   | Group 1 | 1850/35122 | ref              |        |        |       |
|                                                   | Group 2 | 241/11738  | 0.39 (0.34,0.45) | <0.001 |        |       |
|                                                   | Group 3 | 266/10074  | 0.49 (0.43,0.57) | <0.001 |        |       |
| Smoking: yes                                      | Group 4 | 281/6788   | 0.80 (0.7,0.92)  | 0.001  | <0.001 | 0.357 |
|                                                   | Group 1 | 920/15877  | ref              |        |        |       |
|                                                   | Group 2 | 138/5194   | 0.47 (0.39,0.57) | <0.001 |        |       |
|                                                   | Group 3 | 138/4244   | 0.55 (0.45,0.66) | <0.001 |        |       |
| Alcohol drinking: no                              | Group 4 | 140/2748   | 0.87 (0.72,1.06) | 0.174  | <0.001 | 0.418 |
|                                                   | Group 1 | 1739/33241 | ref              |        |        |       |
|                                                   | Group 2 | 228/11355  | 0.38 (0.33,0.44) | <0.001 |        |       |
|                                                   | Group 3 | 244/9114   | 0.50 (0.43,0.58) | <0.001 |        |       |
| Alcohol drinking: yes                             | Group 4 | 248/6109   | 0.77 (0.67,0.89) | <0.001 | <0.001 | 0.263 |
|                                                   | Group 1 | 1017/17176 | ref              |        |        |       |
|                                                   | Group 2 | 149/5392   | 0.49 (0.41,0.60) | <0.001 |        |       |
|                                                   | Group 3 | 158/5146   | 0.53 (0.45,0.64) | <0.001 |        |       |
| Fat intake, g/day<br>< 62.9 [median]              | Group 4 | 180/3522   | 0.90 (0.76,1.07) | 0.168  | <0.001 | 0.418 |
|                                                   | Group 1 | 1501/28170 | ref              |        |        |       |
|                                                   | Group 2 | 187/8700   | 0.40 (0.34,0.47) | <0.001 |        |       |
|                                                   | Group 3 | 194/6711   | 0.55 (0.47,0.65) | <0.001 |        |       |
| $\geq 62.9$ [median]                              | Group 4 | 170/4280   | 0.81 (0.68,0.96) | 0.017  | <0.001 | 0.263 |
|                                                   | Group 1 | 1293/23120 | ref              |        |        |       |
|                                                   | Group 2 | 194/8279   | 0.43 (0.37,0.51) | <0.001 |        |       |
|                                                   | Group 3 | 213/7662   | 0.48 (0.41,0.56) | <0.001 |        |       |
| Protein intake, g/day<br>< 65.2 [median]          | Group 4 | 260/5382   | 0.82 (0.71,0.95) | 0.009  | <0.001 | 0.263 |
|                                                   | Group 1 | 1416/25518 | ref              |        |        |       |
|                                                   | Group 2 | 178/8114   | 0.41 (0.35,0.48) | <0.001 |        |       |
|                                                   | Group 3 | 176/6396   | 0.49 (0.42,0.59) | <0.001 |        |       |
| $\geq 65.2$ [median]                              | Group 4 | 183/4308   | 0.82 (0.69,0.97) | 0.017  | <0.001 | 0.263 |
|                                                   | Group 1 | 1378/25772 | ref              |        |        |       |
|                                                   | Group 2 | 203/8865   | 0.43 (0.37,0.51) | <0.001 |        |       |
|                                                   | Group 3 | 231/7977   | 0.54 (0.46,0.63) | <0.001 |        |       |
| Carbohydrate intake,<br>g/day<br>< 312.8 [median] | Group 4 | 247/5356   | 0.84 (0.72,0.97) | 0.020  | <0.001 | 0.263 |
|                                                   | Group 1 | 1146/19810 | ref              |        |        |       |
|                                                   | Group 2 | 169/6996   | 0.45 (0.38,0.53) | <0.001 |        |       |
|                                                   | Group 3 | 179/6494   | 0.50 (0.42,0.59) | <0.001 |        |       |
| $\geq 312.8$ [median]                             | Group 4 | 226/4750   | 0.91 (0.78,1.07) | 0.256  | <0.001 | 0.263 |
|                                                   | Group 1 | 1648/31480 | ref              |        |        |       |
|                                                   | Group 2 | 212/9984   | 0.41 (0.35,0.47) | <0.001 |        |       |

|         |          |                  |        |
|---------|----------|------------------|--------|
| Group 3 | 228/7880 | 0.54 (0.47,0.63) | <0.001 |
| Group 4 | 204/4912 | 0.75 (0.64,0.88) | <0.001 |

<sup>a</sup> Adjusted for age at baseline (continuous), sex (male/female), BMI (continuous), smoking (yes/no) and drinking status (yes/no), education (middle school or below, high school or college or above), residence (urban or rural), marital status, physical activity (continuous), as well as vegetables (continuous), fruits (continuous), and energy intake (continuous). Abbreviations: BMI, Body Mass Index; SBP, Systolic Blood Pressure; HR, Hazard Ratio; CI, Confidence Interval.
